# Supplementary material
Source: PubMed Central journal article supplement (PMC4093984)
Supplement: jn.113.188599_nutrition188599SupplementaryData1.pdf [file jn.113.188599_nutrition188599SupplementaryData1.pdf]

## Online Supporting Material

Supplemental Table 1. Sex-stratified association between **sugar-sweetened beverage** consumption and abdominal adiposity in 1,036 men and 1,290 women <sup>1</sup>

|                                             | Non-consumers<br>0 - <1/mo | Consumers          |                     |                   | <i>P</i> -trend |
|---------------------------------------------|----------------------------|--------------------|---------------------|-------------------|-----------------|
|                                             |                            | ≥1/mo - <1/wk      | ≥1/wk - <1/d        | ≥1 /d             |                 |
| <b>Men</b>                                  |                            |                    |                     |                   |                 |
| Median intake, <i>servings/wk</i>           | 0                          | 1                  | 4                   | 11                |                 |
| n=1,036                                     | 275                        | 456                | 320                 | 255               |                 |
| BMI, <i>kg/m<sup>2</sup></i>                |                            |                    |                     |                   |                 |
| Model 1                                     | 28.7 (28.2, 29.2)          | 28.0 (27.6, 28.4)  | 28.3 (27.9, 28.8)   | 27.5 (27.0, 28.0) | 0.02            |
| Waist circumference, <sup>3</sup> <i>cm</i> |                            |                    |                     |                   |                 |
| Model 1                                     | 100.3 (99.1, 101.6)        | 99.1 (98.1, 100.0) | 100.2 (99.0, 101.3) | 97.8 (96.5, 99.2) | 0.04            |
| VAT <sup>4</sup> , <i>cm<sup>3</sup></i>    |                            |                    |                     |                   |                 |
| Model 1                                     | 2120 (2020, 2220)          | 2090 (2010, 2160)  | 2290 (2190, 2380)   | 2140 (2030, 2260) | 0.40            |
| Model 1 + SAT <sup>5</sup>                  | 2030 (1940, 2110)          | 2110 (2040, 2170)  | 2270 (2190, 2350)   | 2220 (2130, 2320) | 0.005           |
| SAT <sup>5</sup> , <i>cm<sup>3</sup></i>    |                            |                    |                     |                   |                 |
| Model 1                                     | 2820 (2680, 2960)          | 2530 (2420, 2640)  | 2630 (2500, 2760)   | 2390 (2240, 2540) | 0.005           |
| Model 1 + VAT <sup>4</sup>                  | 2840 (2720, 2960)          | 2580 (2490, 2670)  | 2530 (2430, 2640)   | 2400 (2270, 2520) | <0.001          |
| VAT:SAT ratio <sup>3</sup>                  |                            |                    |                     |                   |                 |
| Model 1                                     | 0.75 (0.72, 0.79)          | 0.81 (0.78, 0.84)  | 0.88 (0.84, 0.91)   | 0.89 (0.85, 0.93) | <0.001          |
| <b>Women</b>                                |                            |                    |                     |                   |                 |
| Median intake, <i>servings/wk</i>           | 0                          | 1                  | 4                   | 9                 |                 |
| n=1,290                                     | 576                        | 454                | 162                 | 98                |                 |
| BMI, <i>kg/m<sup>2</sup></i>                |                            |                    |                     |                   |                 |
| Model 1                                     | 26.9 (26.5, 27.4)          | 26.5 (26.0, 27.0)  | 26.6 (25.8, 27.4)   | 26.3 (25.2, 27.4) | 0.37            |
| Waist circumference, <sup>3</sup> <i>cm</i> |                            |                    |                     |                   |                 |
| Model 1                                     | 91.6 (90.4, 92.7)          | 89.7 (88.5, 91.0)  | 91.2 (89.1, 93.3)   | 90.9 (88.2, 93.7) | 0.91            |
| VAT <sup>4</sup> , <i>cm<sup>3</sup></i>    |                            |                    |                     |                   |                 |
| Model 1                                     | 1270 (1210, 1330)          | 1240 (1180, 1300)  | 1350 (1240, 1460)   | 1340 (1200, 1490) | 0.19            |
| Model 1 + SAT <sup>5</sup>                  | 1230 (1190, 1280)          | 1280 (1230, 1320)  | 1350 (1280, 1430)   | 1390 (1280, 1490) | 0.002           |
| SAT <sup>5</sup> , <i>cm<sup>3</sup></i>    |                            |                    |                     |                   |                 |
| Model 1                                     | 3190 (3070, 3310)          | 2990 (2850, 3120)  | 3070 (2850, 3300)   | 2970 (2680, 3260) | 0.25            |
| Model 1 + VAT <sup>4</sup>                  | 3200 (3120, 3280)          | 3040 (2940, 3130)  | 2970 (2810, 3120)   | 2870 (2660, 3070) | 0.003           |
| VAT:SAT ratio <sup>3</sup>                  |                            |                    |                     |                   |                 |
| Model 1                                     | 0.38 (0.37, 0.39)          | 0.39 (0.38, 0.40)  | 0.41 (0.39, 0.43)   | 0.43 (0.40, 0.46) | 0.001           |

<sup>1</sup> Data presented as means or geometric means and 95% CI.

<sup>2</sup> Model 1 was adjusted for age, energy intake, alcohol intake, diet soda intake, modified DGAI, educational level, physical activity level, smoking status, and Framingham cohort.

<sup>3</sup> Geometric means.

<sup>4</sup> VAT: visceral adipose tissue.

<sup>5</sup> SAT: abdominal subcutaneous adipose tissue
