# Supplementary material
Source: PubMed Central journal article supplement (PMC4093984)
Supplement: jn.113.188599_nutrition188599SupplementaryData2.pdf [file jn.113.188599_nutrition188599SupplementaryData2.pdf]

Online Supporting Material

Supplemental Table 2. Sex-stratified association between **diet soda** consumption and abdominal adiposity in 1,036 men and 1,290 women <sup>1</sup>

|                                             | Non-consumers<br>0 - <1/mo | Consumers           |                     |                      | P-trend |
|---------------------------------------------|----------------------------|---------------------|---------------------|----------------------|---------|
|                                             |                            | ≥1/mo - <1/wk       | ≥1/wk - <1/d        | ≥1 /d                |         |
| <b>Men</b>                                  |                            |                     |                     |                      |         |
| Median intake, <i>servings/wk</i>           | 0                          | 1                   | 4                   | 12                   |         |
| n=1,036                                     | 794                        | 288                 | 122                 | 102                  |         |
| BMI, <i>kg/m<sup>2</sup></i>                |                            |                     |                     |                      |         |
| Model 1                                     | 27.7 (27.4, 28.0)          | 28.5 (28.0, 29.0)   | 28.4 (27.7, 29.1)   | 30.1 (29.3, 30.9)    | <0.001  |
| Waist circumference, <sup>3</sup> <i>cm</i> |                            |                     |                     |                      |         |
| Model 1                                     | 98.4 (97.7, 99.1)          | 100.0 (98.9, 101.2) | 100.2 (98.4, 102.0) | 104.2 (102.2, 106.3) | <0.001  |
| VAT <sup>4</sup> , <i>cm<sup>3</sup></i>    |                            |                     |                     |                      |         |
| Model 1                                     | 2090 (2030, 2150)          | 2160 (2060, 2260)   | 2280 (2130, 2430)   | 2460 (2300, 2630)    | <0.001  |
| Model 1 + SAT <sup>5</sup>                  | 2130 (2080, 2180)          | 2140 (2060, 2220)   | 2270 (2140, 2390)   | 2250 (2110, 2390)    | 0.05    |
| SAT <sup>5</sup> , <i>cm<sup>3</sup></i>    |                            |                     |                     |                      |         |
| Model 1                                     | 2500 (2420, 2580)          | 2640 (2510, 2770)   | 2620 (2410, 2820)   | 3100 (2870, 3320)    | <0.001  |
| Model 1 + VAT <sup>4</sup>                  | 2540 (2480, 2610)          | 2640 (2530, 2750)   | 2520 (2350, 2690)   | 2870 (2680, 3060)    | 0.004   |
| VAT:SAT ratio <sup>3</sup>                  |                            |                     |                     |                      |         |
| Model 1                                     | 0.84 (0.81, 0.86)          | 0.81 (0.77, 0.84)   | 0.84 (0.78, 0.90)   | 0.80 (0.75, 0.86)    | 0.40    |
| <b>Women</b>                                |                            |                     |                     |                      |         |
| Median intake, <i>servings/wk</i>           | 0                          | 1                   | 4                   | 10                   |         |
| n=1,290                                     | 726                        | 311                 | 140                 | 113                  |         |
| BMI, <i>kg/m<sup>2</sup></i>                |                            |                     |                     |                      |         |
| Model 1                                     | 25.8 (25.4, 26.2)          | 27.6 (27.1, 28.2)   | 27.1 (26.2, 27.9)   | 29.3 (28.3, 30.2)    | <0.001  |
| Waist circumference, <sup>3</sup> <i>cm</i> |                            |                     |                     |                      |         |
| Model 1                                     | 88.9 (88.0, 89.9)          | 92.5 (91.0, 94.1)   | 92.9 (90.7, 95.2)   | 95.9 (93.3, 98.5)    | <0.001  |
| VAT <sup>4</sup> , <i>cm<sup>3</sup></i>    |                            |                     |                     |                      |         |
| Model 1                                     | 1190 (1140, 1240)          | 1350 (1270, 1430)   | 1360 (1250, 1480)   | 1530 (1400, 1660)    | <0.001  |
| Model 1 + SAT <sup>5</sup>                  | 1260 (1230, 1300)          | 1280 (1230, 1340)   | 1320 (1240, 1400)   | 1270 (1180, 1360)    | 0.74    |
| SAT <sup>5</sup> , <i>cm<sup>3</sup></i>    |                            |                     |                     |                      |         |
| Model 1                                     | 2870 (2760, 2970)          | 3290 (3130, 3450)   | 3210 (2970, 3440)   | 3820 (3560, 4090)    | <0.001  |
| Model 1 + VAT <sup>4</sup>                  | 2990 (2920, 3070)          | 3180 (3070, 3290)   | 3080 (2910, 3250)   | 3460 (3270, 3650)    | <0.001  |
| VAT:SAT ratio <sup>3</sup>                  |                            |                     |                     |                      |         |
| Model 1                                     | 0.39 (0.38, 0.40)          | 0.38 (0.37, 0.40)   | 0.40 (0.37, 0.42)   | 0.38 (0.35, 0.40)    | 0.42    |

<sup>1</sup> Data presented as means or geometric means and 95% CI.

<sup>2</sup> Model 1 was adjusted for age, energy intake, alcohol intake, sugar-sweetened beverage intake, modified DGAI, educational level, physical activity level, smoking status, and Framingham cohort.

<sup>3</sup> Geometric means.

<sup>4</sup> VAT: visceral adipose tissue.

<sup>5</sup> SAT: abdominal subcutaneous adipose tissue
